# Supplementary material for: Of Fears and Budgets: Strategies of Control in Vespa velutina Invasion and Lessons for Best Management Practices
Source: Springer Nature journal article supplement (doi:10.1007/s00267-022-01690-z), 2022-07-28
Supplement: MOESM1 [file 23315886]

## **Of fears and budgets: Strategies of control in *Vespa velutina* invasion and lessons for best management practices**

Environmental Management

Tamara Pazos, Patricia Álvarez-Figueiró, Jose A. Cortes-Vazquez, María Amalia Jácome, **María J. Servia**

*Dep. of Biology. Faculty of Science. University of A Coruña, UDC. Campus da Zapateira s/n, 15071 A Coruña, Spain. maria.servia@udc.es*

### **Outline of the questionnaire used to obtain information from public attending to the Oleiros Honey Festival - November 2019**

#### **Basic data of the interviewed person**

1. Gender (M/F):
2. Age:
3. Are you allergic to *V. velutina* stings?  
IF SO: How do you know or why do you think you are allergic?

#### **Motivation to call emergency services**

4. Would you call emergency services in case you detect hornets? And in case you detect a nest? Why?

#### **Participation in control actions**

5. Have you ever participated in activities for the control of *V. velutina*?
  - a) IF SO: How did you participate? Options:
    - a.1) Installation of traps
    - a.2) Removal of nests
    - a.3) Other:
  - b) IF SO: Why did you participate?

- b.1) As a contribution to control the expansion of *V. velutina*
- b.2) It has an impact in my economy (beekeeping, agriculture...)
- b.3) I am afraid of hornets
- b.4) Other:

c) IF NOT: Why did you not participate?

- c.1) I did not have the opportunity
- c.2) I do not have the know-how
- c.3) I am afraid of hornets
- c.4) It is not my responsibility
- c.5) Other:

### **Information on the species**

6. Do you feel you are well informed on *V. velutina*?

a) Where do you get information on the species?

- a.1) Local newspapers
- a.2) Scientific papers
- a.3) TV
- a.4) Social media (Facebook, Twitter...)
- a.5) Other:

### **Role of administrations**

7. Do you think the Council or the regional administration are correctly managing the invasion?

Comments:
