# Supplementary material for: Of Fears and Budgets: Strategies of Control in Vespa velutina Invasion and Lessons for Best Management Practices
Source: Springer Nature journal article supplement (doi:10.1007/s00267-022-01690-z), 2022-07-28
Supplement: MOESM2 [file 23315886]

## **Of fears and budgets: Strategies of control in *Vespa velutina* invasion and lessons for best management practices**

Environmental Management

Tamara Pazos, Patricia Álvarez-Figueiró, Jose A. Cortes-Vazquez, María Amalia Jácome, María J. Servia

*Dep. of Biology. Faculty of Science. University of A Coruña, UDC. Campus da Zapateira s/n, 15071 A Coruña, Spain. maria.servia@udc.es*

### **Outline of the questionnaire used for interviewing staff of the Emergency and Civil Protection Unit (ECP-Oleiros) - November 2019**

#### **BLOCK 1. ECP-Oleiros activities and practices in nest removal**

**1.1** Do you remove nests at a specific season of the year or all year round?

a) IF SO... why are they not removed at certain seasons?

**1.2** Do you prioritize any case among all nest removal demands?

a) Which cases are prioritized and why?

**1.3** Which is the most commonly used method for nest removal and why?

**1.4** How did you implement the techniques you use at present for nest removal (bibliography, testing...)?

**1.5** Are you up to date on new techniques and / or devices used for nest removal or neutralization? (IF SO... give examples)

**1.6** Do you try to remove or neutralize a nest even when it seems difficult?

a) In which cases do you desist from removing or neutralizing a nest?

**BLOCK 2. Economic aspects of nest removal.** *Cost estimation of activities answered by the coordinator of the ECP-OLEIROS and the person in charge of the “V. velutina service”*

- 2.1 How long does it take to remove/neutralize a nest (travel time excluded)?
- 2.2 Which consumable material (gloves, insecticide, etc.) do you need?
- a) IF SO... which is the average lifespan of each and how much do they cost?
- 2.3 Reports show that telescopic pole and ladder truck are the most commonly used materials for nest removal. Are there any additional costs for the use of these devices?
- 2.4 Which type of vehicle do you normally use for nest removal activities (visits and neutralization/removal)?
- 2.5 Do you use any high-altitude rescue equipment for high nests?

**BLOCK 3. ECP-Oleiros nest-removal database.** *Questions on details for data curation not included.*

- 3.1 For nests recorded in 2016-early 2017 you indicate whether it is a primary or secondary nest.
- a) Why did you stop recording this information?
- c) Do you think this information might be useful?
- d) IF SO... should this information be added again?
- 3.2 In some cases, the location of the nest is indicated in detail (i.e.: “At the top of the front door”, “On a retaining wall”, “In an apiary”, etc.).
- a) Why do you indicate the location only in some cases?
- b) Do you think this information is necessary before or after the removal?
- c) IF SO... why?
- 3.3 You register the method used to remove the nests (telescopic pole, ladder truck...) only in certain cases, these cases being less numerous after 2017.
- a) Why is it only specified in some cases?
- b) Why has this type of annotation changed, being less frequent after 2017?
- c) Which method did you use in those cases where the removal method is not specified?
- d) Do you think it is useful to know, and therefore add, the type of method used in each case?
- e) Why / why not?
- 3.4 After 2017 you highlight the term “NEUTRALIZED” for some nests (yellow color).
- a) Why is it necessary to highlight these nests?

**3.5** Regarding inaccessible nests, we observed that the reason for non-removal is more detailed in some cases than in others (i.e.: "Not accessible" vs. "Private area without clearing").

- a) Is there a reason for this difference?
- b) Do some cases need to be more detailed than others?
- c) IF SO... which ones and why?

**3.6** Do you think it is necessary to specify the main reason for non-removal (i.e.: "It is above a river", "It is very high", "Lack of adequate material")?

- a) IF SO... why?

**3.7** Which is the most important "observation" to consider for removed and unremoved nests? Why?

#### **BLOCK 4. Calls / queries from the local population**

**4.1** Which are the most common reasons for people to demand the removal of nests (e.g. nest location, allergies, contribution to management, etc.)?

- a) Are these reasons recorded?

**4.2** Is there any reason for nest removal demands that has become more/less common?

- a) IF SO... which one and why do you think it has become more/less common?

**4.3** Do you think you are able to solve any question concerning *V. velutina* (identification of individuals and nests, general information about its life cycle, allergic reactions, etc.)?

**4.4** Which is the most frequent type of question (except on the removal of nests)?

**4.5** What kind of questions and demands are the most difficult to solve and why?

**4.6** What do you do when you do not know how to solve the question?

**4.7** Do you use any particular resource (i.e., an image database, a web resource...) to look for information?

- a) Would it be useful to you to have access to a FAQ content type to answer questions?

**4.8** How do you feel when transmitting information to the population (confident, insecure on the use of technical vocabulary...)?

- a) Do you think people understand your explanations?

**4.9** Do you consider that you are well formed on aspects that can influence the management of *V. velutina* (identification, biology, behavior, allergies...)?

- a) What aspect or aspects are considered a priority?

## **BLOCK 5. Other control activities**

**5.1** Apart from nest removal/neutralization, can you think on any other activity that might be useful for the control of *V. velutina*?

**5.2** Do you set traps at any season of the year?

a) Do you consider trapping as a useful method?

b) Would you recommend this activity to the local population?

**5.3** Do you think the local population should carry out any specific management activity?

a) IF SO... which ones and why?

**5.4** What are the activities, tasks, or tips that local population don't want to perform, although you recommend it?

a) IF SO... why do you think they do not?

**5.5** The Xunta de Galicia has announced a change in the management of the removal of nests that would release you from this work. What do you expect to happen in the coming years?
